# Supplementary figures and images for: The PAWPER tape as a tool for rapid weight assessment in a Paediatric Emergency Department: Validation study and comparison with parents’ estimation and Broselow tape
Source: PubMed Central journal article supplement — Resusc Plus. 2022 Sep 15;12:100301. doi: 10.1016/j.resplu.2022.100301 (PMC9486114; doi:10.1016/j.resplu.2022.100301), 2022-09-15

## Supplementary figure

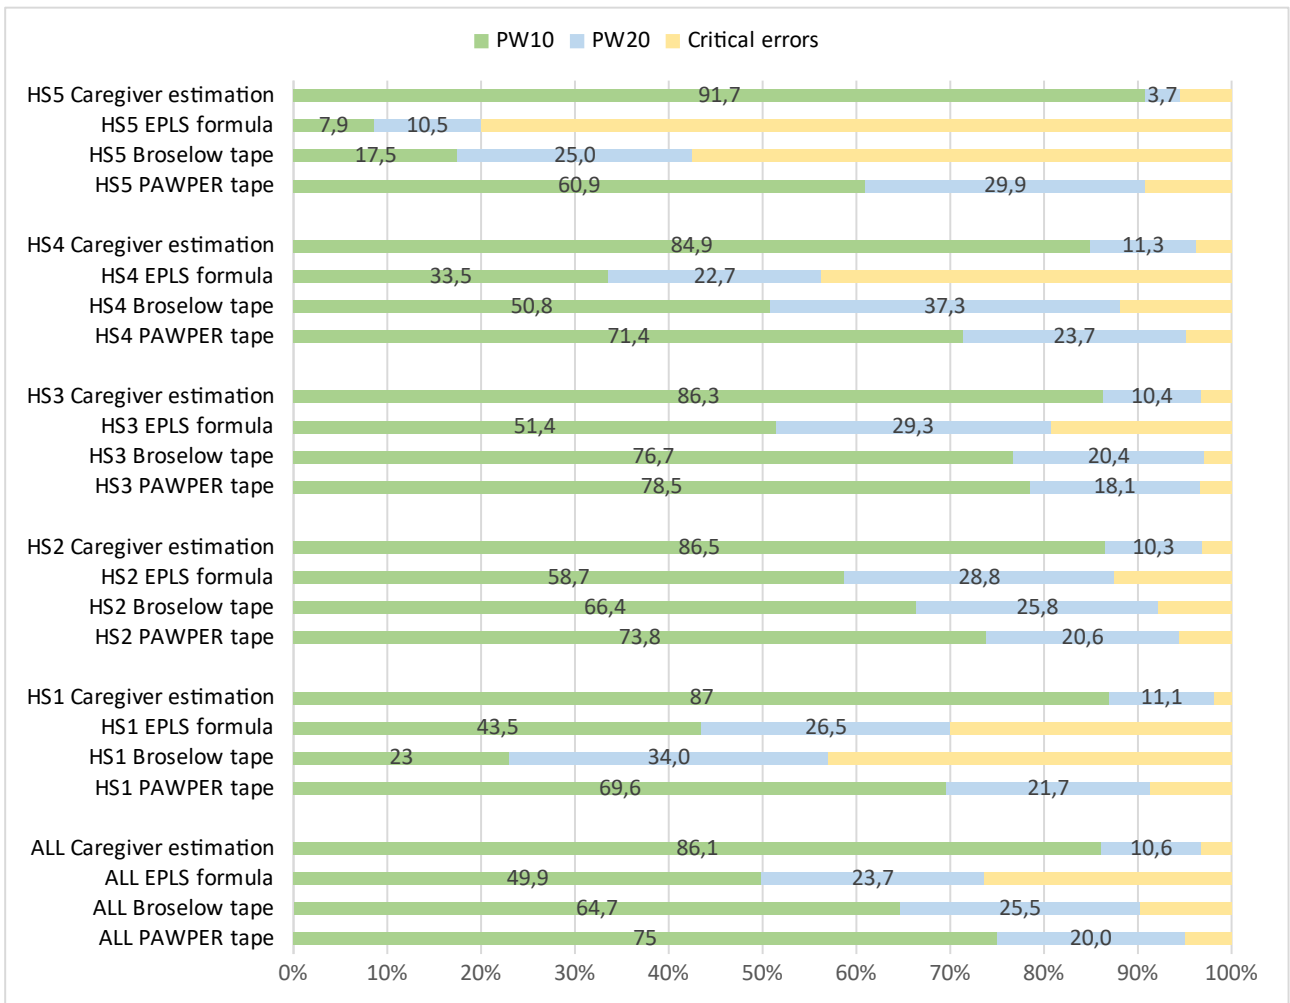

Supplement: mmc1.pdf [file mmc1.pdf]
